# Supplementary material for: Identification of Protein Quality Markers in Toad Venom from Bufo gargarizans
Source: MDPI journal article supplement (doi:10.3390/molecules28083628), 2023-04-21
Supplement: s1 [file s1]

**Table S1.** More information on the potential quality markers candidate list.

| Accession          | Swiss-ID | Protein                                                                            | Function                                                                                                                 |
|--------------------|----------|------------------------------------------------------------------------------------|--------------------------------------------------------------------------------------------------------------------------|
| Comp52143_c1_seq21 | P12067   | Lysozyme C-1                                                                       | Antifungal effect of <i>Candida krusei</i> and <i>Candida albicans</i>                                                   |
| Comp52065_c1_seq1  | O75592   | E3 ubiquitin-protein ligase MYCBP2                                                 | Correlated with inflammatory cell infiltration and cancer prognosis of thyroid cancer                                    |
| Comp25467_c0_seq2  | S4RQT6   | Mindbomb E3 ubiquitin protein ligase 1                                             | Antiviral action; anti-angiogenic factor                                                                                 |
| Comp52171_c0_seq2  | A2AVA0   | Sushi, von Willebrand factor type A, EGF and pentraxin domain-containing protein 1 | Play a role in the cell attachment process                                                                               |
| Comp20546_c0_seq1  | O95714   | E3 ubiquitin-protein ligase HERC2                                                  | Regulates ubiquitin-dependent retention of repair proteins on damaged chromosomes                                        |
| Comp59368_c0_seq1  | A9JTG5   | RanBP-type and C3HC4-type zinc finger-containing protein 1                         | Interferes with TNF-induced cell death and thereby prevents inflammation                                                 |
| Comp51468_c0_seq2  | Q5U4W9   | GLI pathogenesis-related 2                                                         | Suppressed growth of lung cancer cells and lung tumor xenografts                                                         |
| Comp47732_c0_seq1  |          | S homeolog                                                                         |                                                                                                                          |
| Comp30628_c0_seq1  | A4IF69   | NHL repeat-containing protein 2                                                    | Enhance myofibroblast differentiation in FINCA disease                                                                   |
| Comp50754_c1_seq2  | O02839   | Membrane cofactor protein                                                          | Protects autologous cells against complement-mediated injury                                                             |
| Comp50084_c0_seq6  | A0JM49   | E3 ubiquitin-protein ligase listerin                                               | Extraction and degradation of the incomplete translation product                                                         |
| Comp47859_c0_seq1  | A1E295   | Cathepsin B                                                                        | Implicated in tumor invasion and metastasis                                                                              |
| Comp43995_c0_seq5  | B0F0H3   | E3 ubiquitin-protein ligase Makorin-2                                              | Catalyze the covalent attachment of ubiquitin moieties onto substrate proteins; inhibits neurogenesis and axis formation |
| Comp52833_c0_seq1  | A8CG84   | Basic phospholipase A2 DsM-S1                                                      | Catalyzes the calcium-dependent hydrolysis of the 2-acyl groups in 3-sn-phosphoglycerides; effect on nerves              |
| Comp33502_c0_seq1  | Q8K4P1   | Neuropeptide B                                                                     | Regulation of pain                                                                                                       |
| Comp52379_c0_seq11 | A6H730   | Prostatic acid phosphatase                                                         | Lipid phosphatase activity and inactivates lysophosphatidic acid in seminal plasma                                       |
| Comp80513_c0_seq1  | A2A7Z8   | Arylacetamide deacetylase-like 3                                                   | Showing features for active site                                                                                         |
| Comp40289_c0_seq1  | O02739   | Serpin B6                                                                          | Inhibition of serine proteinases                                                                                         |

| Accession         | Swiss-ID | Protein                                      | Function                                                                                                                                                                     |
|-------------------|----------|----------------------------------------------|------------------------------------------------------------------------------------------------------------------------------------------------------------------------------|
|                   |          |                                              | present in the brain or extravasated from the blood                                                                                                                          |
| Comp39279_c0_seq1 | A4IIA2   | Insulin-like growth factor-binding protein 2 | Inhibit or stimulate the growth promoting effects of the IGFs on cell culture                                                                                                |
| Comp49982_c0_seq1 | O08762   | Neurotrypsin                                 | Plays a role in neuronal plasticity and the proteolytic action                                                                                                               |
| Comp51288_c0_seq3 | A0N0X6   | Leucine-rich repeat neuronal protein 1       | Suppresses apoptosis of gastric cancer cells through regulation of Fas/FasL                                                                                                  |
|                   |          |                                              | Promotes ability of mesenchymal stromal cells to suppress T-cell proliferation; expands regulatory T-cells and induces cytotoxic T-cell apoptosis following virus infection. |
| Comp44678_c0_seq2 | O00182   | Galectin-9                                   | Restricts intracellular bacterial growth                                                                                                                                     |
| Comp51969_c1_seq1 | Q9Y5L0   | Transportin 3                                | Involved in immunodeficiency virus (HIV-1) infection                                                                                                                         |
| Comp47586_c0_seq2 | A0M8Q6   | Immunoglobulin lambda constant 7             | Results in the elimination of bound antigens                                                                                                                                 |
| Comp22487_c0_seq1 | O35660   | Glutathione S-transferase Mu 6               | Detoxifies reactive metabolites of xenobiotics                                                                                                                               |
| Comp70215_c0_seq1 | O62671   | Cytochrome P450 2C41                         | Catalyze the metabolism of a wide range of chemicals                                                                                                                         |
| Comp23296_c0_seq1 | P0C7N9   | Proteasome assembly chaperone 4              | responsible for degradation of ubiquitinated proteins in eukaryotic cells                                                                                                    |
| Comp48235_c2_seq1 | A2VDT1   | Protein tyrosine phosphatase type IVA 3      | Associated with cell proliferation, cell motility and invasive activity                                                                                                      |
| Comp702_c0_seq1   | Q5E980   | Cytochrome P450 20A1                         | Play a neurophysiological role                                                                                                                                               |
| Comp44914_c0_seq1 | A7SP74   | Proteasome assembly chaperone 3              | Enables its effective degradation via chaperone-mediated autophagy                                                                                                           |
| Comp35535_c0_seq1 | A8XEN7   | DDB1- and CUL4-associated factor 11 homolog  | Involved in regulation of lifespan                                                                                                                                           |
| Comp68566_c0_seq1 | Q6YTF5   | Cytochrome P450 76M5                         | Play a pivotal role in the detoxification of xenobiotics, cellular metabolism and homeostasis                                                                                |
